# Supplementary material
Source: Springer Nature journal article supplement (https://www.springermedizin.de/resource/supplementary/12894_2012_232_MOESM8_ESM.pdf/9513274)

**Control**

**RT**

**Diclofenac**

**Combination**

**COX-2**

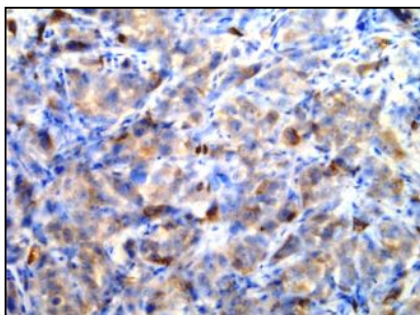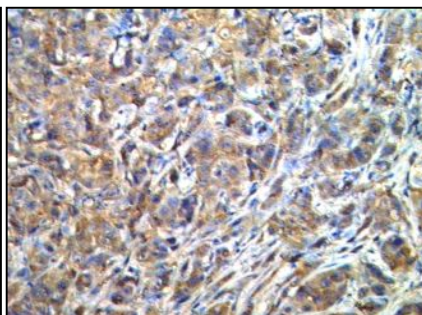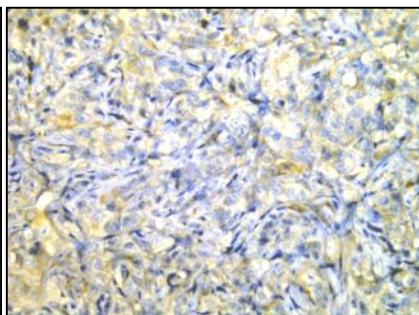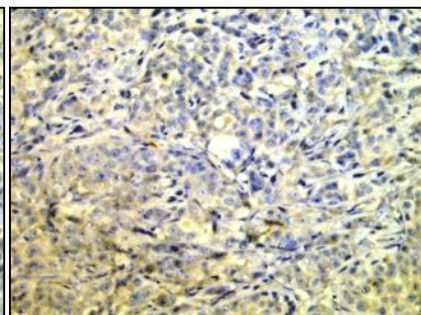

**Ki-67**

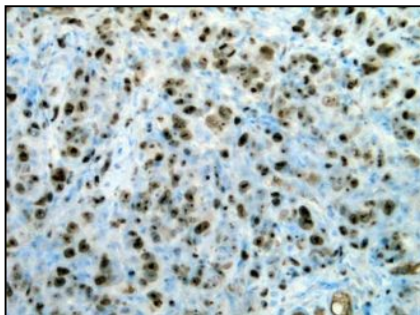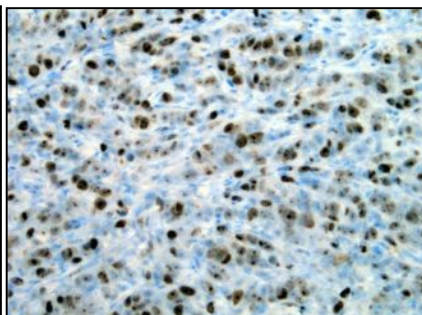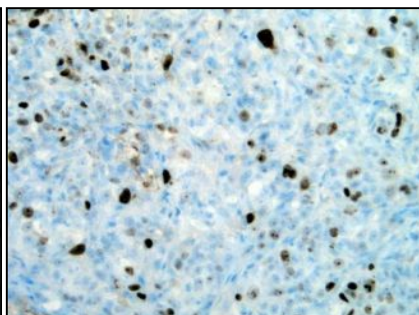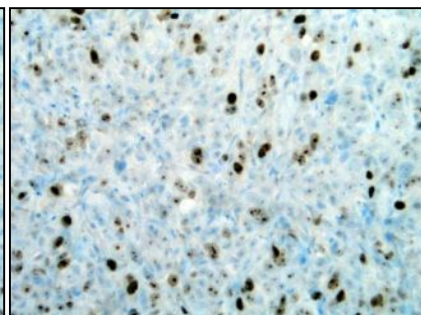

Supplement: MOESM8 [file 9513274]
